# Supplementary material for: New distributional records of the Samana least gecko (Sphaerodactylus samanensis, Cochran, 1932) with comments on its morphological variation and conservation status
Source: PubMed Central journal article supplement (PMC7808264; doi:10.7717/peerj.10404), 2021-01-11
Supplement: peerj-09-10404-s006.pdf [file peerj-09-10404-s006.pdf]

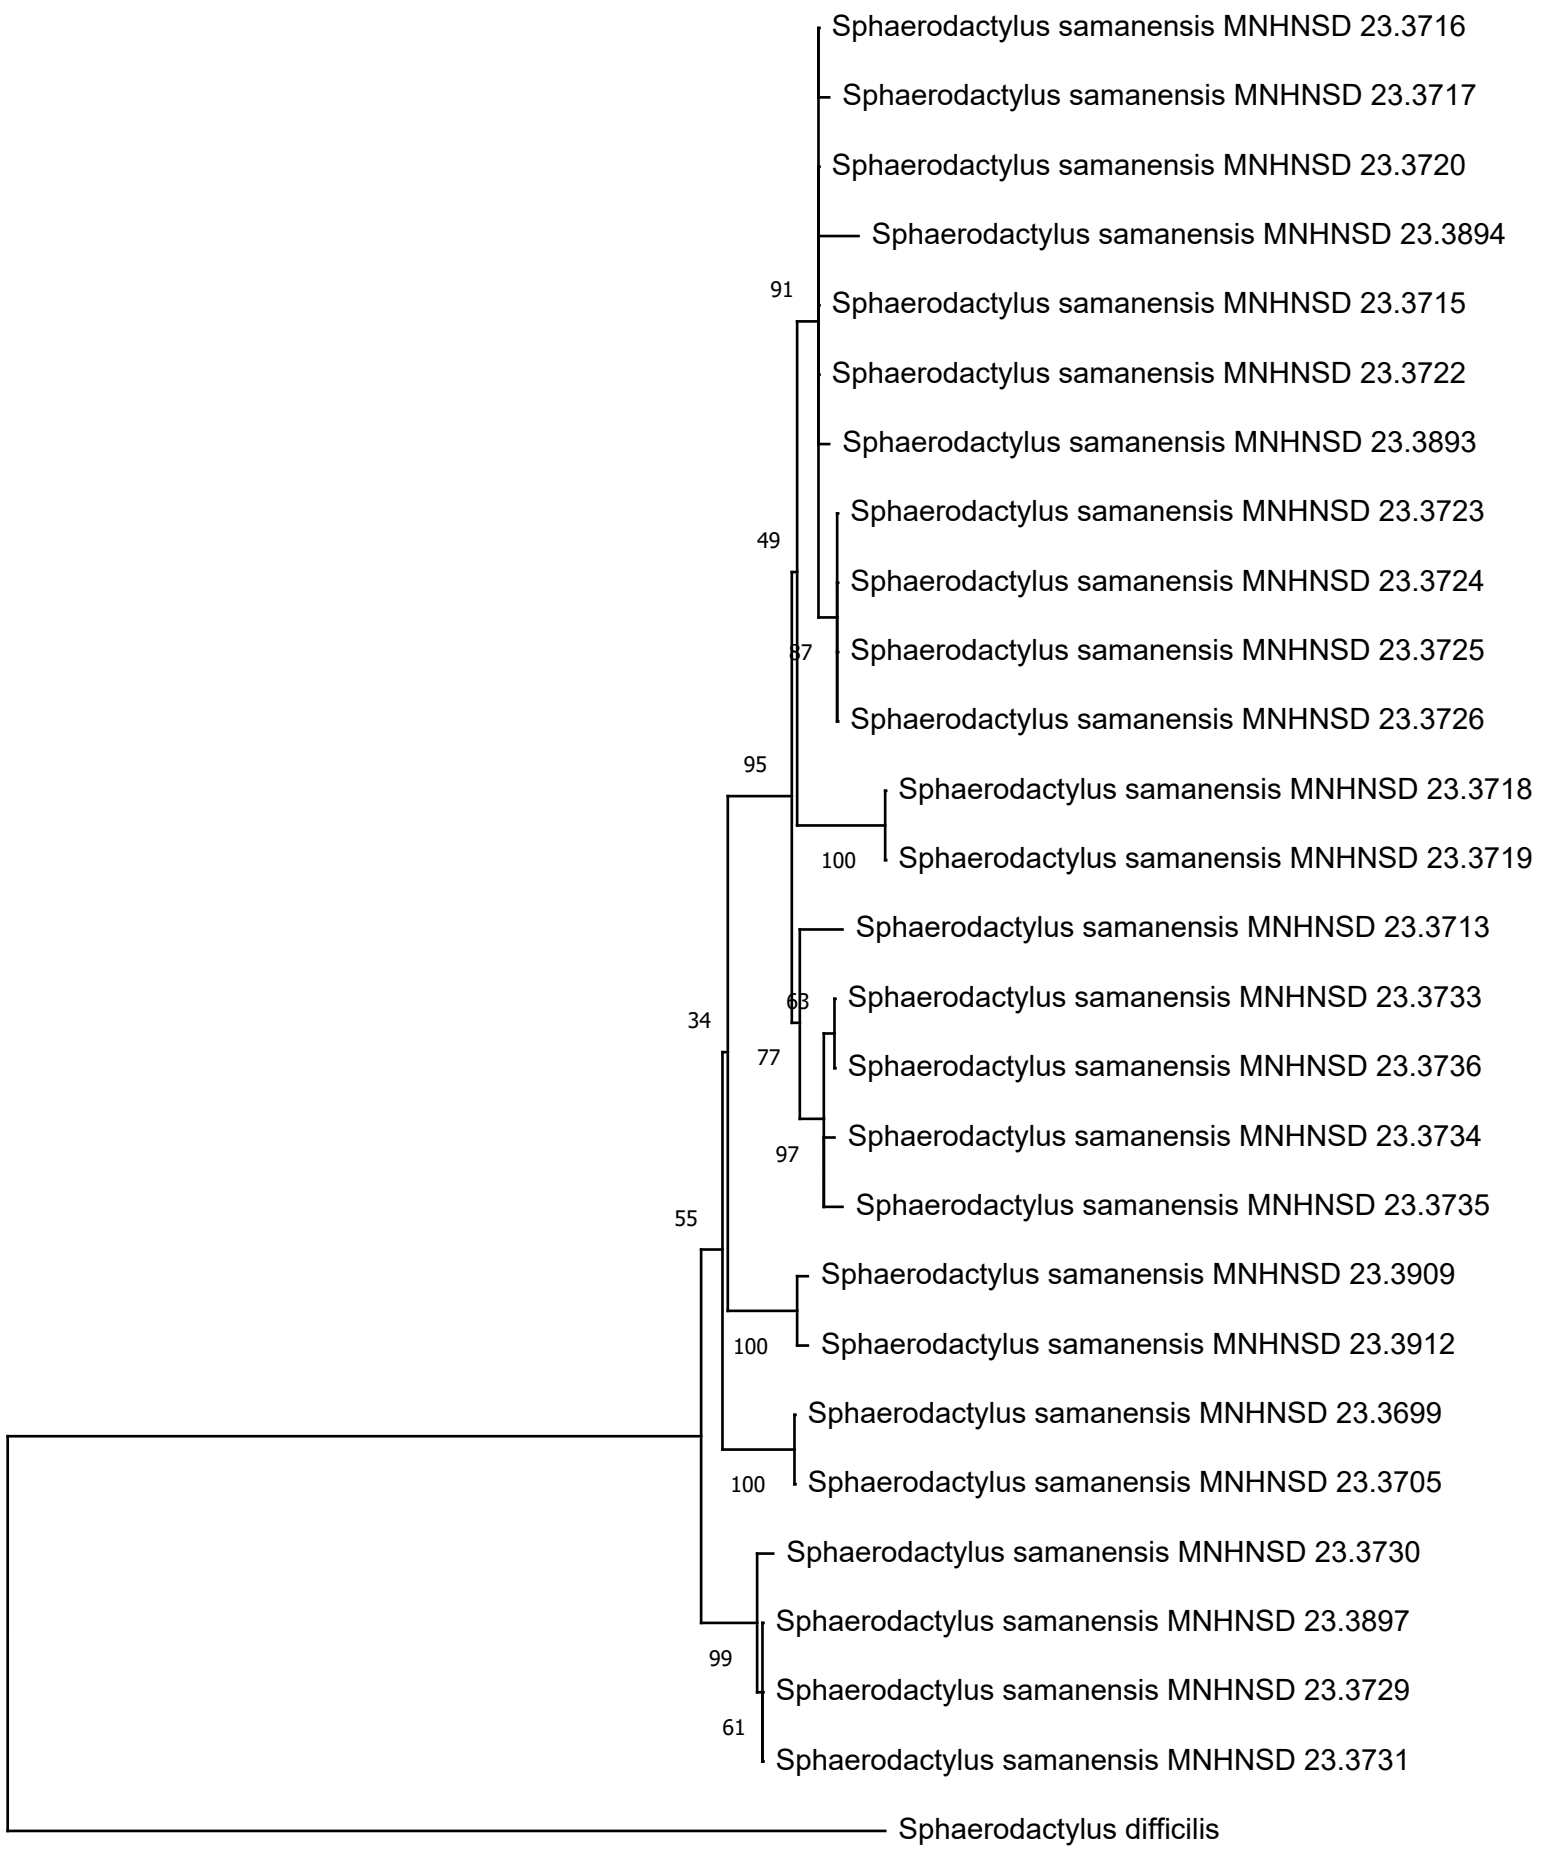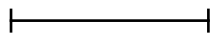

0.020
