# Supplementary material for: New distributional records of the Samana least gecko (Sphaerodactylus samanensis, Cochran, 1932) with comments on its morphological variation and conservation status
Source: PeerJ. 2021 Jan 11;9:e10404. doi: 10.7717/peerj.10404 (PMC7808264; doi:10.7717/peerj.10404)
Supplement: Supplemental Information 1 [file peerj-09-10404-s001.xlsx]

## Sheet: Sheet1
	EASTERN POPULATION
	MALES							FEMALES
	Caño Hondo - Los Haitises National Park			Cueva Casa Grande	Batey Piedra			Caño Hondo - Los Haitises National Park					Cueva Casa Grande				Batey Piedra
MUSEUM VOUCHER	MNHNSD 23.3715	MNHNSD 23.3716	MNHNSD 23.3718	MNHNSD 23.3723	MNHNSD 23.3895	MNHNSD 23.3896	MNHNSD 23.3899	MNHNSD 23.3717	MNHNSD 23.3719	MNHNSD 23.3720	MNHNSD 23.3893	MNHNSD 23.3722	MNHNSD 23.3724	MNHNSD 23.3725	MNHNSD 23.3726	MNHNSD 23.3894	MNHNSD 23.3897	MNHNSD 23.3729	MNHNSD 23.3730	MNHNSD 23.3898	MNHNSD 23.3900	MNHNSD 23.3901	MNHNSD 23.3902	MNHNSD 23.3731
FIELD NUMBER	MALT 0371	MALT 0372	MALT 0380	MALT 0388	MALT 0403	MALT 0404	MALT 0411	MALT 0373	MALT 0381	MALT 0382	MALT 0383	MALT 0384	MALT 0389	MALT 0390	MALT 0391	MALT 0392	MALT 0407	MALT 0408	MALT 0409	MALT 0410	MALT 0412	MALT 0413	MALT 0414	MALT 0415
OCULAR HALO COLORATION	bluish-pearl	Pearl	Pearl	Pearl	Pearl	Pearl	bluish-pearl	Cooper yellow	Cooper yellow	Cooper yellow	Cooper yellow	Cooper yellow	Cooper yellow	Cooper yellow	Cooper	Cooper	Cooper yellow	Cooper yellow	Cooper yellow	Cooper yellow	Cooper yellow	Cooper yellow	Cooper yellow	Cooper yellow
SCAPULAR OCELLI	Present	Present	Present	Absent	Absent	Present	Present	Present	Present	Present	Present	Present	Present	Present	Present	Present	Present	Present	Present	Present	Present	Present	Present	Present
DORSAL BANDS COLORATION	Yellowish-brown	Dark brown	Dark brown	−	−	Dark brown	Yellowish brown	Dark brown	Dark brown	Dark brown	Dark brown	Dark brown	Dark brown	Dark brown	Dark brown	Dark brown	Dark brown	Dark brown	Dark brown	Dark brown	Dark brown	Dark brown	Dark brown	Dark brown
SVL (mm)	28	26.7	26.3	28.6	26.1	25.1	27.2	27.8	27.9	14.6	18.7	17	28	25.4	19.3	16.1	14.8	23.9	22	28.1	28.1	25	24.8	18
NUMBER OF HEAD STRIPES	0	0	0	0	0	4	4	4	4	4	4	4	4	4	4	4	2	4	4	4	4	4	4	4
NUMBER OF NECK BANDS	1	1	0	0	0	1	1	1	1	1	1	1	1	1	1	1	1	1	1	1	1	1	1	1
ESCUTCHEON SCALES NUMBER (LENGTH)	3	3	3	3	4	3	4	0	0	0	0	0	0	0	0	0	0	0	0	0	0	0	0	0
ESCUTCHEON SCALES NUMBER (WIDTH)	10	13	12	11	12	12	11	0	0	0	0	0	0	0	0	0	0	0	0	0	0	0	0	0
ESCUTCHEON SCALES NUMBER (TOTAL)	26	28	31	29	28	32	25	0	0	0	0	0	0	0	0	0	0	0	0	0	0	0	0	0
NUMBER OF DORSAL BANDS	4	4	4	0	0	4	4	4	4	3	3	4	3	3	3	3	3	3	3	3	3	3	3	3
NUMBER OF SCALES COVERED BY A DORSAL BAND	4	4	5	6	0	4	4	5	4	7	6	6	7	5	6	7	5	4	4	4	3	4	4	5
NUMBER OF SCALES IN CONTACT WITH 2ND INFRALABIAL	2.5	2.5	3	3.5	4	5	5	3.5	3.5	3.5	3.5	3.5	4	4	4.5	4.5	5	5	5	5.5	5	5	5	5
	WESTERN POPULATION
	MALES									FEMALES
	Pueblo Viejo Mine				Chacuey Abajo				Cueva de Sabane	Pueblo Viejo Mine												Chacuey Abajo						Cueva de Sanabe
MUSEUM VOUCHER	MNHNSD 23.3699	MNHNSD 23.3706	MNHNSD 23.3707	MNHNSD 23.3909	MNHNSD 23.3733	MNHNSD 23.3734	MNHNSD 23.3735	MNHNSD 23.3905	MNHNSD 23.3713	MNHNSD 23.3697	MNHNSD 23.3698	MNHNSD 23.3701	MNHNSD 23.3702	MNHNSD 23.3703	MNHNSD 23.3704	MNHNSD 23.3910	MNHNSD 23.3911	MNHNSD 23.3912	MNHNSD 23.3913	MNHNSD 23.3914	MNHNSD 23.3705	MNHNSD 23.3736	MNHNSD 23.3903	MNHNSD 23.3904	MNHNSD 23.3906	MNHNSD 23.3907	MNHNSD 23.3908	MNHNSD 23.3712
FIELD NUMBER	MALT 0237	MALT 0258	MALT 0259	MALT 0468	MALT 0417	MALT 0418	MALT 0419	MALT 0423	MALT 0265	MALT 0235	MALT 0236	MALT 0253	MALT 0254	MALT 0255	MALT 0256	MALT 0469	MALT 0470	MALT 0471	MALT 0472	MALT 0473	MALT 0257	MALT 0420	MALT 0421	MALT 0422	MALT 0424	MALT 0425	MALT 0426	MALT 0264
OCULAR HALO COLORATION	Pearl blue	Pearl	Pearl blue	Pearl	Pearl	Pearl yellow	Pearl	Pearl	Pearl	Pearl Yellow	Pearl Yellow	Pearl	Cooper yellow	Pearl yellow	Copper	Copper yellow	Copper yellow	Copper yellow	Copper yellow	Copper yellow	Cooper	Pearl yellow	Cooper	Cooper	Cooper	Cooper	Cooper	Cooper yellow
SCAPULAR OCELLI	Absent	Absent	Absent	Absent	Absent	Absent	Absent	Absent	Absent	Absent	Present	Present	Present	Present	Present	Present	Present	Present	Present	Present	Present	Present	Present	Present	Present	Present	Present	Present
DORSAL BANDS COLORATION	−	−	−	−	−	−	−	−	−	Dark brown	Dark brown	Dark brown	Dark brown	Dark brown	Dark brown	Dark brown	Dark brown	Dark brown	Dark brown	Dark brown	Dark brown	Dark brown	Dark brown	Dark brown	Dark brown	Dark brown	Dark brown	Dark brown
SVL (mm)	28.1	26	27.1	27	27.5	27	26.5	26.5	24.8	23.1	25.9	28.1	27.8	28.1	27	24	26.5	29.7	27	21	23.1	27	27	25	28	27.2	24.5	26.9
NUMBER OF HEAD STRIPES	0	0	0	0	0	0	0	0	0	4	4	4	4	4	4	4	4	4	4	2	4	4	4	4	4	4	4	4
NUMBER OF NECK BANDS	0	0	0	0	0	0	0	0	0	1	2	1	1	1	1	2	2	2	1	1	1	1	1	1	1	1	1	1
ESCUTCHEON SCALES NUMBER (LENGTH)	5	4	4	4	3	3	4	4	3	0	0	0	0	0	0	0	0	0	0	0	0	0	0	0	0	0	0	0
ESCUTCHEON SCALES NUMBER (WIDTH)	17	11	12	12	13	10	11	11	13	0	0	0	0	0	0	0	0	0	0	0	0	0	0	0	0	0	0	0
ESCUTCHEON SCALES NUMBER (TOTAL)	39	34	38	39	34	30	36	35	37	0	0	0	0	0	0	0	0	0	0	0	0	0	0	0	0	0	0	0
NUMBER OF DORSAL BANDS	0	0	0	0	0	0	0	0	0	5	5	4	4	4	4	5	5	6	4	4	5	4	4	4	4	3	4	4
NUMBER OF SCALES COVERED BY A DORSAL BAND	0	0	0	0	0	0	0	0	0	3	3	3	3	3	3	3	3	3	3	3	3	3	3	3	3	3	3	3
NUMBER OF SCALES IN CONTACT WITH 2ND INFRALABIAL	4.5	5	4.5	4.5	4.5	5	5	6	6.5	5	5	5.5	5	5.5	7	5	5	5.5	5	6	5	4	5	5	6	5	4.5	5.5
